# Supplementary material for: Potential Morbidity Reduction for Lung Stereotactic Body Radiation Therapy Using Respiratory Gating
Source: MDPI journal article supplement (doi:10.3390/cancers13205092), 2021-10-12
Supplement: s1 [file s1]

**Table S1.** Dosimetric data with and without gating.

| Case | GW<br>[phase] | PTV<br>[cm <sup>3</sup> ] | PTV            |                 |                 | Lung                                                 |                                               |                                                | Esophagus                |                          | Heart                    |                           | Trachea/<br>large<br>bronchii | Aorta                    | Spinal<br>Cord           | Ribs/<br>chest<br>wall   |
|------|---------------|---------------------------|----------------|-----------------|-----------------|------------------------------------------------------|-----------------------------------------------|------------------------------------------------|--------------------------|--------------------------|--------------------------|---------------------------|-------------------------------|--------------------------|--------------------------|--------------------------|
|      |               |                           | D <sub>2</sub> | D <sub>50</sub> | D <sub>95</sub> | D <sub>mean</sub><br>(Total<br>Lung-<br>GTV)<br>[Gy] | V <sub>20Gy</sub><br>(lung<br>treated)<br>[%] | D <sub>mean</sub><br>(lung<br>treated)<br>[Gy] | D <sub>max</sub><br>[Gy] | D <sub>5cc</sub><br>[Gy] | D <sub>max</sub><br>[Gy] | D <sub>mean</sub><br>[Gy] | D <sub>max</sub><br>[Gy]      | D <sub>max</sub><br>[Gy] | D <sub>max</sub><br>[Gy] | D <sub>max</sub><br>[Gy] |
|      |               |                           | [Gy]           | [Gy]            | [Gy]            | [Gy]                                                 |                                               | [Gy]                                           | [Gy]                     | [Gy]                     | [Gy]                     | [Gy]                      | [Gy]                          | [Gy]                     | [Gy]                     | [Gy]                     |
| 1    | 40–60         | 43.3                      | 61.2           | 51.6            | 45.2            | 3.75                                                 | 6.5                                           | 5.9                                            | 9.0                      | 5.8                      | 13.8                     | 2.3                       | 14.2                          | 8.3                      | 12.3                     | 49.5                     |
|      | no gating     | 59.5                      | 62.2           | 51.4            | 45.0            | 4.32                                                 | 7.5                                           | 6.5                                            | 10.0                     | 6.2                      | 12.9                     | 2.7                       |                               | 8.7                      | 17.1                     | 56.6                     |
| 2    | 40–60         | 35.0                      | 67.6           | 56.0            | 46.0            | 2.86                                                 | 5.1                                           | 4.2                                            | 14.1                     | 2.5                      | 13.3                     | 2.7                       |                               | 8.3                      | 12.3                     | 49.5                     |
|      | no gating     | 31.7                      | 70.3           | 56.1            | 45.3            | 3.21                                                 | 5.7                                           | 4.6                                            | 15.7                     | 3.4                      | 13.2                     | 3.2                       |                               | 27.0                     | 18.2                     | 52.9                     |
| 3    | 40–60         | 11.6                      | 62.4           | 53.1            | 45.3            | 2.13                                                 | 4.2                                           | 3.9                                            | 6.9                      | 0.6                      | 4.6                      | 0.3                       |                               | 11.8                     | 5.5                      |                          |
|      | no gating     | 34.1                      | 62.5           | 55.1            | 44.6            | 3.48                                                 | 9.5                                           | 6.3                                            | 11.2                     | 1.2                      | 13.2                     | 0.2                       | 9.4                           | 15.6                     | 7.3                      |                          |
| 4    | 40–60         | 48.8                      | 66.4           | 55.1            | 43.1            | 4.35                                                 | 8.2                                           | 7.1                                            | 8.1                      | 5.6                      | 12.0                     | 4.5                       |                               | 7.2                      | 9.6                      |                          |
|      | 20–40         | 59.7                      | 69.1           | 55.8            | 42.5            | 4.39                                                 | 8.0                                           | 7.1                                            | 8.3                      | 6.2                      | 12.3                     | 4.8                       | 0.3                           |                          |                          | 59.1                     |
|      | 20–70         | 59.3                      | 72.3           | 57.9            | 41.9            | 4.70                                                 | 8.8                                           | 7.5                                            | 8.7                      | 6.3                      | 13.6                     | 5.2                       | 0.3                           |                          | 10.5                     | 61.7                     |
|      | no gating     | 79.8                      | 69.6           | 56.4            | 42.9            | 4.90                                                 | 10.1                                          | 8.2                                            | 8.6                      | 6.4                      | 14.3                     | 5.4                       | 0.5                           |                          | 10.6                     | 58.6                     |
|      |               |                           |                |                 |                 |                                                      |                                               |                                                |                          |                          |                          |                           |                               |                          |                          |                          |
| 5    | 40–60         | 14.9                      | 68.7           | 56.7            | 46.0            | 2.14                                                 | 2.0                                           | 2.8                                            | 28.1                     | 13.3                     | 22.6                     | 1.0                       |                               | 14.6                     | 17.4                     |                          |
|      | 20–40         | 15.4                      | 68.0           | 56.0            | 45.4            | 2.03                                                 | 1.9                                           | 2.7                                            | 25.7                     | 13.6                     | 23.2                     | 0.9                       |                               | 14.2                     | 18.0                     |                          |
|      | 20–70         | 15.9                      | 73.5           | 58.4            | 46.8            | 2.14                                                 | 2.1                                           | 2.8                                            | 27.2                     | 13.8                     | 24.4                     | 0.9                       |                               | 13.9                     | 19.0                     |                          |
|      | no gating     | 17.3                      | 70.6           | 58.9            | 45.9            | 2.45                                                 | 2.2                                           | 3.1                                            | 29.7                     | 16.2                     | 27.5                     | 1.5                       | 65.6                          | 16.1                     | 18.5                     |                          |
|      |               |                           |                |                 |                 |                                                      |                                               |                                                |                          |                          |                          |                           |                               |                          |                          |                          |
| 6    | 40–60         | 36.1                      | 67.8           | 56.0            | 45.8            | 3.76                                                 | 11.0                                          | 6.2                                            | 11.6                     | 7.9                      | 4.2                      | 0.3                       |                               | 28.9                     | 7.6                      |                          |
|      | 20–40         | 38.1                      | 65.6           | 54.5            | 45.1            | 3.88                                                 | 11.6                                          | 6.4                                            | 11.7                     | 7.3                      | 5.7                      | 0.3                       |                               | 27.9                     | 6.1                      |                          |
|      | 20–70         | 42.2                      | 68.5           | 57.8            | 48.5            | 4.36                                                 | 14.1                                          | 7.2                                            | 12.4                     | 7.9                      | 7.1                      | 0.4                       |                               | 30.3                     | 7.3                      |                          |
|      | no gating     | 48.3                      | 79.5           | 63.2            | 48.4            | 5.23                                                 | 17.5                                          | 6.5                                            | 17.2                     | 11.2                     | 8.6                      | 0.4                       | 17.6                          | 38.5                     | 11.6                     | 28.4                     |
|      |               |                           |                |                 |                 |                                                      |                                               |                                                |                          |                          |                          |                           |                               |                          |                          |                          |
| 7    | 40–60         | 28.2                      | 61.2           | 54.0            | 46.1            | 4.01                                                 | 15.1                                          | 9.8                                            | 48.0                     | 22.0                     | 34.7                     | 2.4                       | 13.8                          |                          | 13.9                     | 24.8                     |
|      | 20–40         | 29.4                      | 64.1           | 54.6            | 45.9            | 3.98                                                 | 15.3                                          | 9.6                                            | 44.1                     | 20.0                     | 32.6                     | 2.1                       | 10.7                          |                          | 16.5                     | 23.1                     |
|      | 20–70         | 34.7                      | 65.8           | 56.1            | 46.7            | 4.44                                                 | 17.5                                          | 10.7                                           | 46.2                     | 22.4                     | 34.2                     | 2.4                       | 13.3                          |                          | 17.3                     | 26.8                     |
|      | no gating     | 41.8                      | 67.6           | 55.5            | 46.3            | 4.83                                                 | 22.9                                          | 12.1                                           | 46.7                     | 22.2                     | 36.6                     | 2.5                       | 20.1                          | 16.7                     | 21.9                     | 26.5                     |
|      |               |                           |                |                 |                 |                                                      |                                               |                                                |                          |                          |                          |                           |                               |                          |                          |                          |
| 8    | 40–60         | 83.1                      | 60.9           | 52.9            | 45.1            | 5.51                                                 | 16.7                                          | 8.9                                            | 29.2                     | 16.3                     | 48.7                     | 2.5                       |                               | 56.6                     | 12.4                     |                          |
|      | 20–40         | 80.4                      | 61.1           | 52.7            | 45.5            | 5.31                                                 | 16.6                                          | 8.6                                            | 29.2                     | 15.1                     | 55.6                     | 2.8                       |                               | 57.4                     | 10.7                     |                          |
|      | 20–70         | 89.9                      | 63.5           | 55.0            | 46.8            | 5.75                                                 | 17.8                                          | 9.1                                            | 31.1                     | 16.7                     | 56.8                     | 3.1                       |                               | 58.4                     | 13.0                     |                          |
|      | no gating     | 99.2                      | 64.4           | 56.0            | 46.0            | 5.87                                                 | 19.0                                          | 9.6                                            | 31.0                     | 17.5                     | 52.0                     | 3.0                       | 42.5                          | 60.3                     | 13.8                     |                          |
|      |               |                           |                |                 |                 |                                                      |                                               |                                                |                          |                          |                          |                           |                               |                          |                          |                          |
| 9    | 40–60         | 71.1                      | 62.6           | 54.3            | 43.2            | 6.21                                                 | 12.9                                          | 9.2                                            | 28.4                     | 17.7                     | 10.8                     | 2.2                       |                               | 26.9                     | 15.9                     |                          |
|      | 20–40         | 61.7                      | 61.2           | 54.1            | 45.9            | 6.30                                                 | 12.5                                          | 9.0                                            | 24.9                     | 15.6                     | 12.9                     | 2.4                       |                               | 23.3                     | 18.7                     |                          |
|      | 20–70         | 75.7                      | 65.5           | 55.5            | 43.7            | 6.73                                                 | 14.3                                          | 9.6                                            | 27.1                     | 16.8                     | 12.0                     | 2.5                       |                               | 26.1                     | 20.1                     |                          |
|      | no gating     | 91.6                      | 65.1           | 56.5            | 43.8            | 6.76                                                 | 14.5                                          | 9.7                                            | 32.6                     | 19.5                     | 19.0                     | 3.2                       |                               | 29.7                     | 18.0                     |                          |
|      |               |                           |                |                 |                 |                                                      |                                               |                                                |                          |                          |                          |                           |                               |                          |                          |                          |
| 10   | 40–60         | 62.9                      | 59.9           | 51.8            | 44.9            | 5.05                                                 | 14.2                                          | 9.0                                            | 20.5                     | 12.3                     | 33.5                     | 3.3                       |                               | 22.9                     | 14.4                     |                          |
|      | no gating     | 93.5                      | 59.1           | 52.0            | 44.1            | 5.76                                                 | 17.2                                          | 10.2                                           | 25.6                     | 16.9                     | 44.4                     | 4.3                       |                               | 28.6                     | 16.4                     |                          |
| 11   | 40–60         | 40.7                      | 64.5           | 54.4            | 45.9            | 2.53                                                 | 4.2                                           | 3.3                                            | 19.0                     | 10.6                     | 0.8                      | 0.1                       |                               | 49.6                     | 13.2                     |                          |
|      | no gating     | 45.0                      | 66.4           | 54.9            | 45.6            | 2.65                                                 | 4.5                                           | 3.6                                            | 19.1                     | 12.6                     | 0.9                      | 0.1                       |                               | 55.7                     | 10.8                     |                          |
| 12   | 40–60         | 16.4                      | 64.2           | 53.3            | 45.3            | 1.72                                                 | 3.7                                           | 2.9                                            | 25.9                     | 0.4                      | 0.1                      | 0.0                       |                               | 53.8                     | 7.8                      |                          |
|      | no gating     | 18.2                      | 62.3           | 50.7            | 38.7            | 1.81                                                 | 4.1                                           | 3.1                                            | 26.9                     | 3.4                      | 0.2                      | 0.0                       |                               | 48.3                     | 7.8                      |                          |
| 13   | 40–60         | 8.9                       | 65.6           | 53.5            | 44.3            | 3.48                                                 | 6.6                                           | 6.2                                            | 6.8                      | 0.5                      | 25.3                     | 2.7                       |                               | 5.4                      | 4.1                      |                          |
|      | no gating     | 14.0                      | 65.1           | 52.3            | 40.1            | 3.95                                                 | 7.9                                           | 6.9                                            | 7.3                      | 0.6                      | 25.3                     | 3.3                       | 0.6                           | 5.9                      | 4.0                      |                          |
| 14   | 40–60         | 8.5                       | 67.0           | 55.2            | 45.3            | 1.26                                                 | 2.2                                           | 2.0                                            | 8.2                      | 0.5                      | 0.1                      | 0.0                       |                               | 10.0                     | 6.6                      |                          |
|      | no gating     | 12.2                      | 66.6           | 55.5            | 44.6            | 1.51                                                 | 3.0                                           | 2.5                                            | 9.6                      | 4.5                      | 0.2                      | 0.0                       | 12.0                          | 12.0                     | 8.5                      |                          |
